# Supplementary material for: Charge Profile Analysis Reveals That Activation of Pro-apoptotic Regulators Bax and Bak Relies on Charge Transfer Mediated Allosteric Regulation
Source: PLoS Comput Biol. 2012 Jun 14;8(6):e1002565. doi: 10.1371/journal.pcbi.1002565 (PMC3375244; doi:10.1371/journal.pcbi.1002565)
Supplement: Figure S2 — Sequence alignment between Bax and Bak reveals rather low sequence identity (ClustalW2 Score 19%). An asterisk indicates a single, fully conserved residue. A colon indicates conservation between groups of strongly similar biochemical properties. A period indicates conservation between groups of weakly similar biochemical properties. The sequence alignment for the central helices and the structural alignment are given in Figure 6. (PDF) [file pcbi.1002565.s002.pdf]

|     |     |                                                                         |             |
|-----|-----|-------------------------------------------------------------------------|-------------|
| Bax | 1   | - M D G S G E Q P - - - R G G G P T S - - - - - S E Q I M K             | 21          |
| Bak | 1   | M A S G Q G P G P P R Q E C G E P A L P S A S E E Q V A Q D T E E V F R | 36          |
|     |     | . * . * * . * * :                                                       | : * : : : : |
| Bax | 22  | T G A L L L Q G F I Q D R A G R M G G E A P E L A L D P V P Q D A S T K | 57          |
| Bak | 37  | S Y V F Y R H Q Q E Q E A E G V A A P A D P E M V T L P L Q P S S T M G | 72          |
|     |     | : . : : * : * . * * : . * : . : :                                       |             |
| Bax | 58  | K L S E C L K R I G D E L D S - - N M E L Q R M I A A V D - - T D S P R | 89          |
| Bak | 73  | Q V G R Q L A I I G D D I N R R Y D S E F Q T M L Q H L Q P T A E N A Y | 108         |
|     |     | : : . . * * * : : : : * : * * : : : : . .                               |             |
| Bax | 90  | E V F F R V A A D M F S D G N F N W G R V V A L F Y F A S K L V L K A L | 125         |
| Bak | 109 | E Y F T K I A T S L F E S G - I N W G R V V A L L G F G Y R L A L H V Y | 143         |
|     |     | * * : : * : . : * . . * : * * * * * * * : * . : * . * : .               |             |
| Bax | 126 | C T K V P E L I R T I M G W T L D F L R E R L L G - W I Q D Q G G W D G | 160         |
| Bak | 144 | Q H G L T G F L G Q V T R F V V D F M L H H C I A R W I A Q R G G W V A | 179         |
|     |     | : . : : : : : * * : . : : * * : : * * * .                               |             |
| Bax | 161 | L L S Y F G T P T W Q T V T I F V A G V L T A S L T I W K K M G -       | 192         |
| Bak | 180 | A L N - L G N G P I L N V L V V L G V V L L G Q F V V R R F F K S       | 211         |
