# Supplementary material for: Charge Profile Analysis Reveals That Activation of Pro-apoptotic Regulators Bax and Bak Relies on Charge Transfer Mediated Allosteric Regulation
Source: PubMed Central journal article supplement (PMC3375244; doi:10.1371/journal.pcbi.1002565), 2012-06-14

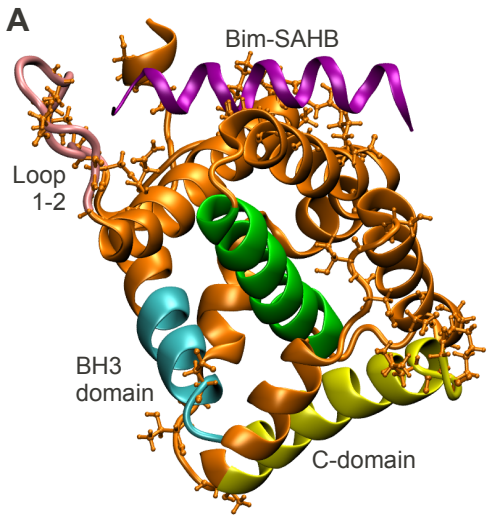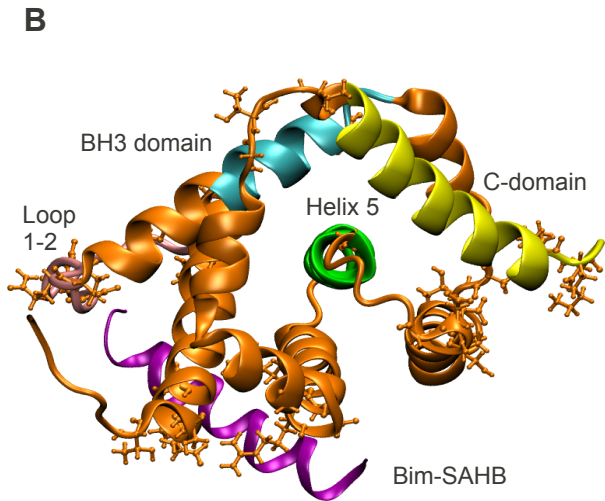

Supplement: pcbi.1002565.s001.pdf [file pcbi.1002565.s001.pdf]
