# Supplementary material for: Charge Profile Analysis Reveals That Activation of Pro-apoptotic Regulators Bax and Bak Relies on Charge Transfer Mediated Allosteric Regulation
Source: PLoS Comput Biol. 2012 Jun 14;8(6):e1002565. doi: 10.1371/journal.pcbi.1002565 (PMC3375244; doi:10.1371/journal.pcbi.1002565)
Supplement: Table S1 — Changes in the charge profile of all Bax residues upon Bax activation. Net charge transfer was computed as the total difference in charge per residue (Qres). The intra-residue charge density redistributions were evaluated as the root mean square deviation in charge per residue (RMSDres). Both descriptors were computed using EEM atomic charges, and their mathematical derivation can be found in the Methods section. All quantities are given in elementary charges (1 e has approximately 1.602×10−19 coulombs). The cell background colors mark the various domains of the Bax molecule in agreement with Figure 1 (BH3-domain in cyan, C-domain in yellow, loop 1–2 in pink, and helix 5 in green). The residues which exhibited a net charge transfer of more than one standard deviation over the average are marked in bold, and the color of the font indicates whether the respective residues became more positive (red) or more negative (blue) upon activation. These residues are also displayed explicitly in Figure 5. (PDF) [file pcbi.1002565.s003.pdf]

Table S1: Changes in the charge profile of all Bax residues upon Bax activation.

| Residue | $\Delta Q_{\text{res}}$ [e] | $RMSD_{\text{res}}$ [e] | Residue | $\Delta Q_{\text{res}}$ [e] | $RMSD_{\text{res}}$ [e] | Residue | $\Delta Q_{\text{res}}$ [e] | $RMSD_{\text{res}}$ [e] |
|---------|-----------------------------|-------------------------|---------|-----------------------------|-------------------------|---------|-----------------------------|-------------------------|
| 1       | -0.1727                     | 0.0197                  | 65      | 0.2925                      | 0.0268                  | 129     | -0.0789                     | 0.0265                  |
| 2       | -0.2581                     | 0.0346                  | 66      | 0.0650                      | 0.0267                  | 130     | -0.0329                     | 0.0092                  |
| 3       | 0.0362                      | 0.0299                  | 67      | -0.0221                     | 0.0207                  | 131     | -0.1535                     | 0.0213                  |
| 4       | -0.1329                     | 0.0471                  | 68      | -0.0845                     | 0.0241                  | 132     | -0.0990                     | 0.0195                  |
| 5       | 0.1505                      | 0.0473                  | 69      | 0.1032                      | 0.0322                  | 133     | -0.1109                     | 0.0256                  |
| 6       | -0.0575                     | 0.0233                  | 70      | 0.0157                      | 0.0276                  | 134     | 0.3244                      | 0.0381                  |
| 7       | 0.3395                      | 0.0292                  | 71      | -0.1625                     | 0.0392                  | 135     | -0.0550                     | 0.0148                  |
| 8       | 0.0183                      | 0.0252                  | 72      | -0.2149                     | 0.0342                  | 136     | -0.0387                     | 0.0149                  |
| 9       | -0.0806                     | 0.0202                  | 73      | 0.1549                      | 0.0356                  | 137     | 0.0572                      | 0.0269                  |
| 10      | 0.0749                      | 0.0326                  | 74      | 0.1090                      | 0.0274                  | 138     | -0.2163                     | 0.0406                  |
| 11      | -0.0580                     | 0.0246                  | 75      | -0.0763                     | 0.0341                  | 139     | -0.0770                     | 0.0131                  |
| 12      | -0.0543                     | 0.0261                  | 76      | -0.0212                     | 0.0165                  | 140     | 0.0605                      | 0.0267                  |
| 13      | 0.0429                      | 0.0297                  | 77      | 0.0882                      | 0.0363                  | 141     | -0.1517                     | 0.0251                  |
| 14      | -0.2795                     | 0.0387                  | 78      | -0.1416                     | 0.0198                  | 142     | -0.3367                     | 0.0535                  |
| 15      | -0.0438                     | 0.0341                  | 79      | 0.0604                      | 0.0217                  | 143     | 0.0186                      | 0.0133                  |
| 16      | 0.1542                      | 0.0440                  | 80      | 0.1033                      | 0.0273                  | 144     | -0.0900                     | 0.0173                  |
| 17      | -0.3526                     | 0.0406                  | 81      | -0.1483                     | 0.0246                  | 145     | 0.0221                      | 0.0398                  |
| 18      | -0.1413                     | 0.0249                  | 82      | -0.9790                     | 0.0243                  | 146     | -0.2237                     | 0.0270                  |
| 19      | 0.1719                      | 0.0214                  | 83      | 0.0138                      | 0.0282                  | 147     | 0.1143                      | 0.0314                  |
| 20      | 0.0130                      | 0.0180                  | 84      | -0.3090                     | 0.0427                  | 148     | -0.0160                     | 0.0172                  |
| 21      | 0.0406                      | 0.0406                  | 85      | -0.0824                     | 0.0498                  | 149     | 0.0015                      | 0.0271                  |
| 22      | -0.0559                     | 0.0172                  | 86      | -0.0585                     | 0.0362                  | 150     | -0.0401                     | 0.0419                  |
| 23      | -0.1198                     | 0.0241                  | 87      | 0.0218                      | 0.0532                  | 151     | -0.1758                     | 0.0307                  |
| 24      | 0.0097                      | 0.0160                  | 88      | -0.0281                     | 0.0126                  | 152     | -0.0757                     | 0.0271                  |
| 25      | -0.1363                     | 0.0213                  | 89      | 0.2063                      | 0.0310                  | 153     | -0.0706                     | 0.0350                  |
| 26      | 0.0005                      | 0.0112                  | 90      | -0.1491                     | 0.0297                  | 154     | 0.0215                      | 0.0230                  |
| 27      | -0.0028                     | 0.0198                  | 91      | 0.0201                      | 0.0149                  | 155     | 0.1332                      | 0.0161                  |
| 28      | 0.0162                      | 0.0234                  | 92      | -0.0622                     | 0.0148                  | 156     | -0.0122                     | 0.0235                  |
| 29      | -0.1682                     | 0.0291                  | 93      | 0.0009                      | 0.0166                  | 157     | -0.0645                     | 0.0239                  |
| 30      | 0.0664                      | 0.0141                  | 94      | 0.2583                      | 0.0340                  | 158     | -0.0152                     | 0.0128                  |
| 31      | 0.0481                      | 0.0089                  | 95      | 0.0280                      | 0.0296                  | 159     | 0.1476                      | 0.0303                  |
| 32      | -0.0194                     | 0.0407                  | 96      | 0.0181                      | 0.0154                  | 160     | -0.0065                     | 0.0223                  |
| 33      | -0.1330                     | 0.0359                  | 97      | -0.0047                     | 0.0171                  | 161     | 0.0606                      | 0.0130                  |
| 34      | -0.1380                     | 0.0351                  | 98      | -0.2369                     | 0.0458                  | 162     | 0.2290                      | 0.0255                  |
| 35      | -0.0988                     | 0.0221                  | 99      | -0.1696                     | 0.0262                  | 163     | 0.0564                      | 0.0194                  |
| 36      | -0.0804                     | 0.0285                  | 100     | -0.0130                     | 0.0218                  | 164     | -0.0555                     | 0.0214                  |
| 37      | 0.3251                      | 0.0310                  | 101     | -0.2590                     | 0.0408                  | 165     | 0.3539                      | 0.0289                  |
| 38      | 0.1516                      | 0.0258                  | 102     | -0.2960                     | 0.0424                  | 166     | 0.1540                      | 0.0518                  |
| 39      | 0.1640                      | 0.0394                  | 103     | 0.0283                      | 0.0381                  | 167     | -0.3723                     | 0.0508                  |
| 40      | 0.1234                      | 0.0409                  | 104     | 0.0962                      | 0.0303                  | 168     | 0.0442                      | 0.0216                  |
| 41      | 0.0227                      | 0.0257                  | 105     | 0.0431                      | 0.0160                  | 169     | 0.0308                      | 0.0434                  |
| 42      | -0.3192                     | 0.05                    | 106     | 0.0669                      | 0.0314                  | 170     | -0.0262                     | 0.0273                  |
| 43      | 0.0534                      | 0.0228                  | 107     | -0.2199                     | 0.0328                  | 171     | -0.0509                     | 0.0123                  |
| 44      | 0.3388                      | 0.0322                  | 108     | 0.1159                      | 0.0517                  | 172     | -0.1682                     | 0.0314                  |
| 45      | -0.0372                     | 0.0322                  | 109     | 0.2676                      | 0.0354                  | 173     | 0.1683                      | 0.0231                  |
| 46      | -0.2372                     | 0.0589                  | 110     | 0.0538                      | 0.0275                  | 174     | 0.1826                      | 0.0359                  |
| 47      | 0.3098                      | 0.0319                  | 111     | -0.0034                     | 0.0239                  | 175     | -0.1683                     | 0.0134                  |
| 48      | -0.3366                     | 0.0580                  | 112     | -0.1253                     | 0.0235                  | 176     | -0.0898                     | 0.0191                  |
| 49      | 0.2935                      | 0.0327                  | 113     | -0.0981                     | 0.0225                  | 177     | 0.0877                      | 0.0293                  |
| 50      | 0.0295                      | 0.04                    | 114     | 0.1738                      | 0.0182                  | 178     | 0.0036                      | 0.0167                  |
| 51      | -0.0329                     | 0.0132                  | 115     | 0.0333                      | 0.0150                  | 179     | -0.0522                     | 0.0175                  |
| 52      | 0.0810                      | 0.04                    | 116     | -0.1464                     | 0.0131                  | 180     | -0.0921                     | 0.0141                  |
| 53      | -0.0396                     | 0.0454                  | 117     | 0.0532                      | 0.0165                  | 181     | -0.0433                     | 0.0310                  |
| 54      | 0.0887                      | 0.0204                  | 118     | -0.0467                     | 0.0269                  | 182     | -0.0004                     | 0.0182                  |
| 55      | 0.0890                      | 0.0271                  | 119     | 0.2563                      | 0.0326                  | 183     | -0.0600                     | 0.0184                  |
| 56      | 0.0836                      | 0.0255                  | 120     | 0.0884                      | 0.0186                  | 184     | -0.0403                     | 0.0182                  |
| 57      | 0.0399                      | 0.0248                  | 121     | -0.0412                     | 0.0119                  | 185     | 0.1295                      | 0.0210                  |
| 58      | -0.0536                     | 0.0164                  | 122     | -0.0197                     | 0.0154                  | 186     | 0.1059                      | 0.0190                  |
| 59      | 0.0526                      | 0.0141                  | 123     | 0.0267                      | 0.0157                  | 187     | -0.0701                     | 0.0242                  |
| 60      | -0.0712                     | 0.0321                  | 124     | -0.1912                     | 0.0256                  | 188     | -0.3319                     | 0.0340                  |
| 61      | 0.0300                      | 0.0186                  | 125     | -0.1811                     | 0.0247                  | 189     | 0.3947                      | 0.0493                  |
| 62      | -0.0291                     | 0.0187                  | 126     | 0.1548                      | 0.0251                  | 190     | 0.5118                      | 0.0487                  |
| 63      | 0.0454                      | 0.0159                  | 127     | 0.1162                      | 0.0216                  | 191     | -0.1540                     | 0.0341                  |
| 64      | 0.3360                      | 0.0315                  | 128     | -0.0400                     | 0.0154                  | 192     | 0.0606                      | 0.06                    |
